# Supplementary material for: Insights into the Geographical Origins of the Cabo Verde Green Monkey
Source: MDPI journal article supplement (doi:10.3390/genes15040504), 2024-04-17
Supplement: s1 [file s1]

**File S1.** Portuguese version of the abstract

O macaco verde *Chlorocebus sabaeus*, L. 1766, nativo da África Ocidental, foi introduzido no arquipélago de Cabo Verde desde o século XVI. Fontes históricas sugerem que, devido à importância de Cabo Verde como entreposto comercial no comércio atlântico de escravos, é difícil estabelecer a origem exacta da introdução desta espécie. Foram recolhidas amostras fecais não invasivas de indivíduos de macacos verdes selvagens e de cativeiro em Cabo Verde. Dois fragmentos mitocondriais, HVRI e cyt *b*, foram utilizados para confirmar a identificação taxonómica da espécie e para tentativamente identificar a origem geográfica da introdução no arquipélago a partir do continente africano. Comparando as novas sequências deste estudo com as previamente publicadas, foi demonstrado que os indivíduos de Cabo Verde têm haplótipos únicos no HVRI, ao mesmo tempo que mostram afinidades com várias populações da costa noroeste de África no cyt *b*, sugerindo prováveis fontes múltiplas de introdução e uma origem mais provável indeterminada. Esta última é consistente com a informação histórica, mas pode também ter resultado da utilização exclusiva do mtDNA como marcador genético e das características de dispersão da espécie. As limitações da metodologia são discutidas e são sugeridas futuras direcções de investigação.
