# Supplementary material for: Insights into the Geographical Origins of the Cabo Verde Green Monkey
Source: MDPI journal article supplement (doi:10.3390/genes15040504), 2024-04-17
Supplement: s1 [file s1]

**Table S1.** Details of the green monkey samples used in this study. The tissue code or GenBank accession number (GenBank), the amplified gene, and the country, locality (NP, National Park), and geographical coordinates (Lat, latitude; Long, longitude), and their origin (W, wild; M, museum; C, captive), and published references (Ref.) are indicated (\*, this study).

| GenBank  | Gene         | Country      | Locality       | Lat       | Long      | Origin | Ref. |
|----------|--------------|--------------|----------------|-----------|-----------|--------|------|
| JX983778 | cyt <i>b</i> | Burkina Faso | Comoe Leraba   | 9.902600  | -4.654540 | W      | [23] |
| JX983779 | cyt <i>b</i> | Burkina Faso | Comoe Leraba   | 9.902600  | -4.654540 | W      | [23] |
| JX983780 | cyt <i>b</i> | Burkina Faso | Comoe Leraba   | 9.902600  | -4.654540 | W      | [23] |
| JX983781 | cyt <i>b</i> | Burkina Faso | Comoe Leraba   | 9.848960  | -4.623020 | W      | [23] |
| JX983782 | cyt <i>b</i> | Burkina Faso | Comoe Leraba   | 9.848960  | -4.623020 | W      | [23] |
| JX983783 | cyt <i>b</i> | Burkina Faso | Comoe Leraba   | 9.848960  | -4.623020 | W      | [23] |
| JX983784 | cyt <i>b</i> | Burkina Faso | Comoe Leraba   | 9.852910  | -4.614150 | W      | [23] |
| JX983785 | cyt <i>b</i> | Burkina Faso | Comoe Leraba   | 9.869920  | -4.656260 | W      | [23] |
| JX983786 | cyt <i>b</i> | Burkina Faso | Comoe Leraba   | 9.869920  | -4.656260 | W      | [23] |
| JX983787 | cyt <i>b</i> | Burkina Faso | Comoe Leraba   | 9.862070  | -4.669740 | W      | [23] |
| JX983788 | cyt <i>b</i> | Burkina Faso | Comoe Leraba   | 9.862070  | -4.669740 | W      | [23] |
| JX983789 | cyt <i>b</i> | Burkina Faso | Comoe Leraba   | 9.862070  | -4.669740 | W      | [23] |
| JX983790 | cyt <i>b</i> | Burkina Faso | Comoe Leraba   | 9.862070  | -4.669740 | W      | [23] |
| JX983791 | cyt <i>b</i> | Burkina Faso | Comoe Leraba   | 9.775300  | -4.602710 | W      | [23] |
| JX983792 | cyt <i>b</i> | Burkina Faso | FC Deux Bale   | 11.550790 | -2.957570 | W      | [23] |
| JX983793 | cyt <i>b</i> | Burkina Faso | Ranch Nazinga  | 11.161820 | -1.609670 | W      | [23] |
| JX983794 | cyt <i>b</i> | Burkina Faso | Ranch Nazinga  | 11.135140 | -1.612650 | W      | [23] |
| JX983795 | cyt <i>b</i> | Burkina Faso | Ranch Nazinga  | 11.155940 | -1.614450 | W      | [23] |
| JX983796 | cyt <i>b</i> | Burkina Faso | Ranch Nazinga  | 11.148700 | -1.623340 | W      | [23] |
| JX983797 | cyt <i>b</i> | Burkina Faso | Ranch Nazinga  | 11.148700 | -1.623340 | W      | [23] |
| JX983798 | cyt <i>b</i> | Burkina Faso | Ranch Nazinga  | 11.148700 | -1.623340 | W      | [23] |
| JX983799 | cyt <i>b</i> | Burkina Faso | Ranch Nazinga  | 11.148700 | -1.623340 | W      | [23] |
| JX983800 | cyt <i>b</i> | Burkina Faso | Ranch Nazinga  | 11.155470 | -1.610300 | W      | [23] |
| JX983801 | cyt <i>b</i> | Burkina Faso | Ranch Nazinga  | 11.155470 | -1.610300 | W      | [23] |
| JX983802 | cyt <i>b</i> | Burkina Faso | Ranch Nazinga  | 11.155470 | -1.610300 | W      | [23] |
| JX983803 | cyt <i>b</i> | Ghana        | Kratshi/Krachi | 7.800000  | -0.050000 | W      | [23] |
| JX983804 | cyt <i>b</i> | Ghana        | Bui NP         | 8.290830  | -2.284650 | W      | [23] |
| JX983805 | cyt <i>b</i> | Ghana        | Bui NP         | 8.291140  | -2.284310 | W      | [23] |
| JX983806 | cyt <i>b</i> | Ghana        | Bui NP         | 8.291140  | -2.284310 | W      | [23] |
| JX983807 | cyt <i>b</i> | Ghana        | Bui NP         | 8.290900  | -2.283880 | W      | [23] |
| JX983808 | cyt <i>b</i> | Ghana        | Bui NP         | 8.291260  | -2.283150 | W      | [23] |
| JX983809 | cyt <i>b</i> | Ghana        | Bui NP         | 8.290830  | -2.284650 | W      | [23] |
| JX983810 | cyt <i>b</i> | Ghana        | Bui NP         | 8.290830  | -2.284650 | W      | [23] |
| JX983811 | cyt <i>b</i> | Ghana        | Mole NP        | 9.260080  | -1.860580 | W      | [23] |
| JX983812 | cyt <i>b</i> | Ghana        | Mole NP        | 9.260580  | -1.861470 | W      | [23] |
| JX983813 | cyt <i>b</i> | Ghana        | Mole NP        | 9.258760  | -1.847140 | W      | [23] |
| JX983814 | cyt <i>b</i> | Ghana        | Mole NP        | 9.258760  | -1.847140 | W      | [23] |
| JX983815 | cyt <i>b</i> | Ghana        | Mole NP        | 9.258760  | -1.847140 | W      | [23] |
| JX983816 | cyt <i>b</i> | Ghana        | Mole NP        | 9.251830  | -1.861050 | W      | [23] |

|              |              |                 |                 |           |            |   |      |
|--------------|--------------|-----------------|-----------------|-----------|------------|---|------|
| JX983817     | cyt <i>b</i> | Ghana           | Mole NP         | 9.251830  | -1.861050  | W | [23] |
| JX983818     | cyt <i>b</i> | Ghana           | Mole NP         | 9.251830  | -1.861050  | W | [23] |
| JX983819     | cyt <i>b</i> | Ghana           | Mole NP         | 9.251830  | -1.861050  | W | [23] |
| JX983820     | cyt <i>b</i> | Ghana           | Mole NP         | 9.251830  | -1.861050  | W | [23] |
| JX983821     | cyt <i>b</i> | Ghana           | Mole NP         | 9.251830  | -1.861050  | W | [23] |
| JX983822     | cyt <i>b</i> | Ghana           | Mole NP         | 9.251830  | -1.861050  | W | [23] |
| JX983823     | cyt <i>b</i> | Ghana           | Shai Hills RR   | 5.897770  | 0.068970   | W | [23] |
| JX983824     | cyt <i>b</i> | Ghana           | Shai Hills RR   | 5.890010  | 0.043820   | W | [23] |
| JX983825     | cyt <i>b</i> | Liberia         | Gola Country    | 7.443170  | -10.777790 | C | [23] |
| JX983826     | cyt <i>b</i> | Mauritania      | Podor, Senegal  | 16.548440 | -14.243040 | M | [23] |
| JX983827     | cyt <i>b</i> | Senegal         | Niokolo Koba NP | 13.075360 | -12.722390 | W | [23] |
| JX983828     | cyt <i>b</i> | Senegal         | Niokolo Koba NP | 13.025770 | -13.237360 | W | [23] |
| KJ193307     | cyt <i>b</i> | Guinea          | Koubia          | 11.780000 | -11.790000 | W | [26] |
| KJ193308     | cyt <i>b</i> | Guinea          | Koubia          | 11.780000 | -11.790000 | W | [26] |
| KJ193309     | cyt <i>b</i> | Guinea          | Koubia          | 11.780000 | -11.790000 | W | [26] |
| KJ193310     | cyt <i>b</i> | Guinea          | Koubia          | 11.780000 | -11.790000 | W | [26] |
| KJ193311     | cyt <i>b</i> | Guinea          | Koubia          | 11.780000 | -11.790000 | W | [26] |
| KJ193494     | cyt <i>b</i> | Guinea          | Koubia          | 11.780001 | -11.790001 | W | [26] |
| EF597503     | cyt <i>b</i> | Senegal         | -               | -         | -          | C | [43] |
| JQ256910     | cyt <i>b</i> | Mauritania      | Podor, Senegal  | 16.548440 | -14.243040 | M | [44] |
| JQ256913     | cyt <i>b</i> | Sierra Leone    | -               | -         | -          | M | [44] |
| XR 005236371 | cyt <i>b</i> | -               | -               | -         | -          | C | -    |
| NC 008066    | cyt <i>b</i> | St Kitts Island | VMRC            | -         | -          | C | [33] |
| DQ069713     | cyt <i>b</i> | St Kitts Island | VMRC            | -         | -          | C | [33] |
| KU682697     | cyt <i>b</i> | Ghana           | -               | -         | -          | W | [45] |
| MZ188967     | cyt <i>b</i> | United States   | Dania Beach     | -         | -          | W | [24] |
| OP089551     | cyt <i>b</i> | Côte d'Ivoire   | Yopougon        | 5.317666  | -4.089991  | W | [46] |
| OP089552     | cyt <i>b</i> | Côte d'Ivoire   | Yopougon        | 5.317666  | -4.089991  | W | [46] |
| OP089553     | cyt <i>b</i> | Côte d'Ivoire   | Yopougon        | 5.317666  | -4.089991  | W | [46] |
| OP089554     | cyt <i>b</i> | Côte d'Ivoire   | Yopougon        | 5.317666  | -4.089991  | W | [46] |
| OP089555     | cyt <i>b</i> | Côte d'Ivoire   | Yopougon        | 5.317666  | -4.089991  | W | [46] |
| OP089556     | cyt <i>b</i> | Côte d'Ivoire   | Yopougon        | 5.317666  | -4.089991  | W | [46] |
| OP089557     | cyt <i>b</i> | Côte d'Ivoire   | Yopougon        | 5.317666  | -4.089991  | W | [46] |
| OP089558     | cyt <i>b</i> | Côte d'Ivoire   | Yopougon        | 5.317666  | -4.089991  | W | [46] |
| OP089559     | cyt <i>b</i> | Côte d'Ivoire   | Yopougon        | 5.317666  | -4.089991  | W | [46] |
| OP089561     | cyt <i>b</i> | Côte d'Ivoire   | Yopougon        | 5.317666  | -4.089991  | W | [46] |
| PP620289     | cyt <i>b</i> | Cabo Verde      | Sal             | 16.62153  | -22.91789  | C | *    |
| PP620292     | cyt <i>b</i> | Cabo Verde      | Sal             | 16.62153  | -22.91789  | C | *    |
| PP620290     | cyt <i>b</i> | Cabo Verde      | Santiago        | 14.91666  | -23.60416  | C | *    |
| PP620291     | cyt <i>b</i> | Cabo Verde      | Santiago        | 14.91666  | -23.60416  | C | *    |
| PP620293     | cyt <i>b</i> | Cabo Verde      | Santiago        | 14.91666  | -23.60416  | C | *    |
| PP620294     | cyt <i>b</i> | Cabo Verde      | Santiago        | 14.91666  | -23.60416  | C | *    |
| PP620295     | cyt <i>b</i> | Cabo Verde      | Santiago        | 14.91666  | -23.60416  | C | *    |
| PP053817     | cyt <i>b</i> | Guinea-Bissau   | Bijagós         | 11.181079 | -16.014061 | W | [27] |
| PP053818     | cyt <i>b</i> | Guinea-Bissau   | Bijagós         | 11.181213 | -16.014040 | W | [27] |

|          |              |               |                |           |            |   |      |
|----------|--------------|---------------|----------------|-----------|------------|---|------|
| PP053819 | cyt <i>b</i> | Guinea-Bissau | Bijagós        | 11.156381 | -16.023569 | W | [27] |
| PP053820 | cyt <i>b</i> | Guinea-Bissau | Bijagós        | 11.142019 | -16.023033 | W | [27] |
| PP053821 | cyt <i>b</i> | Guinea-Bissau | Bijagós        | 11.142610 | -16.024138 | W | [27] |
| PP053822 | cyt <i>b</i> | Guinea-Bissau | Bijagós        | 11.189673 | -16.014547 | W | [27] |
| PP053823 | cyt <i>b</i> | Guinea-Bissau | Bijagós        | 11.189663 | -16.014599 | W | [27] |
| PP053824 | cyt <i>b</i> | Guinea-Bissau | Bijagós        | 11.147685 | -16.024084 | W | [27] |
| PP053825 | cyt <i>b</i> | Guinea-Bissau | Bijagós        | 11.149734 | -16.020313 | W | [27] |
| PP053826 | cyt <i>b</i> | Guinea-Bissau | Bijagós        | 11.156542 | -16.019891 | W | [27] |
| PP053827 | cyt <i>b</i> | Guinea-Bissau | Bijagós        | 11.156617 | -16.019783 | W | [27] |
| PP053828 | cyt <i>b</i> | Guinea-Bissau | Bijagós        | 11.178124 | -16.017105 | W | [27] |
| PP053829 | cyt <i>b</i> | Guinea-Bissau | Bijagós        | 11.177919 | -16.017429 | W | [27] |
| PP053830 | cyt <i>b</i> | Guinea-Bissau | Bijagós        | 11.177932 | -16.017398 | W | [27] |
| PP053831 | cyt <i>b</i> | Guinea-Bissau | Bijagós        | 11.177731 | -16.017533 | W | [27] |
| PP053832 | cyt <i>b</i> | Guinea-Bissau | Bijagós        | 11.084400 | -16.221100 | W | [27] |
| PP053833 | cyt <i>b</i> | Guinea-Bissau | Bijagós        | 11.271042 | -16.174266 | W | [27] |
| PP053834 | cyt <i>b</i> | Guinea-Bissau | Boé NP         | 11.832394 | -13.805349 | W | [27] |
| PP053835 | cyt <i>b</i> | Guinea-Bissau | Boé NP         | 11.932757 | -13.785056 | W | [27] |
| PP053836 | cyt <i>b</i> | Guinea-Bissau | Boé NP         | 11.938790 | -13.781128 | W | [27] |
| PP053837 | cyt <i>b</i> | Guinea-Bissau | Boé NP         | 11.927518 | -14.238246 | W | [27] |
| PP053838 | cyt <i>b</i> | Guinea-Bissau | Boé NP         | 11.927528 | -14.238303 | W | [27] |
| PP053839 | cyt <i>b</i> | Guinea-Bissau | Boé NP         | 11.927584 | -14.238426 | W | [27] |
| PP053840 | cyt <i>b</i> | Guinea-Bissau | Boé NP         | 11.927579 | -14.238382 | W | [27] |
| PP053841 | cyt <i>b</i> | Guinea-Bissau | Boé NP         | 11.920890 | -14.239909 | W | [27] |
| PP053842 | cyt <i>b</i> | Guinea-Bissau | Boé NP         | 11.920981 | -14.239945 | W | [27] |
| PP053843 | cyt <i>b</i> | Guinea-Bissau | Boé NP         | 11.933605 | -13.751766 | W | [27] |
| PP053844 | cyt <i>b</i> | Guinea-Bissau | Boé NP         | 11.933219 | -13.751964 | W | [27] |
| PP053845 | cyt <i>b</i> | Guinea-Bissau | Boé NP         | 11.933229 | -13.752008 | W | [27] |
| PP053846 | cyt <i>b</i> | Guinea-Bissau | Boé NP         | 11.933180 | -13.752026 | W | [27] |
| PP053847 | cyt <i>b</i> | Guinea-Bissau | Boé NP         | 11.933180 | -13.752026 | W | [27] |
| PP053848 | cyt <i>b</i> | Guinea-Bissau | Boé NP         | 11.933241 | -13.751948 | W | [27] |
| PP053849 | cyt <i>b</i> | Guinea-Bissau | Boé NP         | 11.933191 | -13.751988 | W | [27] |
| PP053850 | cyt <i>b</i> | Guinea-Bissau | Boé NP         | 11.932444 | -13.756259 | W | [27] |
| PP053851 | cyt <i>b</i> | Guinea-Bissau | Boé NP         | 11.932556 | -13.756233 | W | [27] |
| PP053852 | cyt <i>b</i> | Guinea-Bissau | Boé NP         | 11.932493 | -13.756258 | W | [27] |
| PP053853 | cyt <i>b</i> | Guinea-Bissau | Boé NP         | 11.932562 | -13.756249 | W | [27] |
| PP053854 | cyt <i>b</i> | Guinea-Bissau | Boé NP         | 11.932574 | -13.756227 | W | [27] |
| PP053855 | cyt <i>b</i> | Guinea-Bissau | Boé NP         | 11.932548 | -13.756235 | W | [27] |
| PP053856 | cyt <i>b</i> | Guinea-Bissau | Boé NP         | 11.932437 | -13.756303 | W | [27] |
| PP053857 | cyt <i>b</i> | Guinea-Bissau | Boé NP         | 11.932504 | -13.756295 | W | [27] |
| PP053858 | cyt <i>b</i> | Guinea-Bissau | Boé NP         | 11.932544 | -13.756337 | W | [27] |
| PP053859 | cyt <i>b</i> | Guinea-Bissau | Cantanhez      | 11.111478 | -15.128143 | W | [27] |
| PP053860 | cyt <i>b</i> | Guinea-Bissau | Cantanhez      | 11.111486 | -15.128148 | W | [27] |
| PP053861 | cyt <i>b</i> | Guinea-Bissau | Cufada Lagoons | 11.645079 | -15.250188 | W | [27] |
| PP053862 | cyt <i>b</i> | Guinea-Bissau | Cufada Lagoons | 11.645162 | -15.250847 | W | [27] |
| PP053863 | cyt <i>b</i> | Guinea-Bissau | Cufada Lagoons | 11.649280 | -15.111430 | W | [27] |

|           |              |                 |                |           |            |   |      |
|-----------|--------------|-----------------|----------------|-----------|------------|---|------|
| PP053864  | cyt <i>b</i> | Guinea-Bissau   | Cufada Lagoons | 11.600576 | -15.087729 | W | [27] |
| PP053865  | cyt <i>b</i> | Guinea-Bissau   | Cufada Lagoons | 11.600571 | -15.087734 | W | [27] |
| PP053866  | cyt <i>b</i> | Guinea-Bissau   | Cufada Lagoons | 11.600552 | -15.087933 | W | [27] |
| PP053867  | cyt <i>b</i> | Guinea-Bissau   | Cufada Lagoons | 11.650172 | -15.135876 | W | [27] |
| PP053868  | cyt <i>b</i> | Guinea-Bissau   | Dulombi NP     | 11.800455 | -14.327705 | W | [27] |
| PP053869  | cyt <i>b</i> | Guinea-Bissau   | Dulombi NP     | 11.812565 | -14.396407 | W | [27] |
| PP053870  | cyt <i>b</i> | Guinea-Bissau   | Dulombi NP     | 11.818034 | -14.393708 | W | [27] |
| PP053871  | cyt <i>b</i> | Guinea-Bissau   | Dulombi NP     | 11.818199 | -14.394055 | W | [27] |
| PP053872  | cyt <i>b</i> | Guinea-Bissau   | Dulombi NP     | 11.818353 | -14.394057 | W | [27] |
| PP053873  | cyt <i>b</i> | Guinea-Bissau   | Dulombi NP     | 11.818437 | -14.393795 | W | [27] |
| PP053874  | cyt <i>b</i> | Guinea-Bissau   | Dulombi NP     | 11.818366 | -14.393722 | W | [27] |
| PP053875  | cyt <i>b</i> | Guinea-Bissau   | Dulombi NP     | 11.818309 | -14.393606 | W | [27] |
| JQ256910  | HVRI         | Mauritania      | Podor, Senegal | 16.548440 | -14.243040 | M | [44] |
| NC 008066 | HVRI         | St Kitts Island | VMRC           | -         | -          | C | [33] |
| EF597503  | HVRI         | Senegal         | -              | -         | -          | C | [43] |
| KU682697  | HVRI         | Ghana           | -              | -         | -          | W | [45] |
| JQ256913  | HVRI         | SL, Sierra      | -              | -         | -          | M | [44] |
| DQ069713  | HVRI         | St Kitts Island | VMRC           | -         | -          | C | [33] |
| PP620296  | HVRI         | Cabo Verde      | Sal            | 16.621530 | -22.917890 | C | *    |
| PP620297  | HVRI         | Cabo Verde      | Santiago       | 14.975340 | -23.517980 | W | *    |
| PP620298  | HVRI         | Cabo Verde      | Santiago       | 14.995420 | -23.526960 | W | *    |
| PP620299  | HVRI         | Cabo Verde      | Santiago       | 14.916660 | -23.604160 | C | *    |
| PP620300  | HVRI         | Cabo Verde      | Santiago       | 14.916660 | -23.604160 | C | *    |
| PP620301  | HVRI         | Cabo Verde      | Santiago       | 14.916660 | -23.604160 | C | *    |
| PP620302  | HVRI         | Cabo Verde      | Santiago       | 14.916660 | -23.604160 | C | *    |
| PP053930  | HVRI         | Guinea-Bissau   | Bijagós        | 11.181079 | -16.014061 | W | [27] |
| PP053931  | HVRI         | Guinea-Bissau   | Bijagós        | 11.181213 | -16.014040 | W | [27] |
| PP053932  | HVRI         | Guinea-Bissau   | Bijagós        | 11.156381 | -16.023569 | W | [27] |
| PP053933  | HVRI         | Guinea-Bissau   | Bijagós        | 11.142019 | -16.023033 | W | [27] |
| PP053934  | HVRI         | Guinea-Bissau   | Bijagós        | 11.142610 | -16.024138 | W | [27] |
| PP053935  | HVRI         | Guinea-Bissau   | Bijagós        | 11.189673 | -16.014547 | W | [27] |
| PP053936  | HVRI         | Guinea-Bissau   | Bijagós        | 11.189663 | -16.014599 | W | [27] |
| PP053937  | HVRI         | Guinea-Bissau   | Bijagós        | 11.147685 | -16.024084 | W | [27] |
| PP053938  | HVRI         | Guinea-Bissau   | Bijagós        | 11.149734 | -16.020313 | W | [27] |
| PP053939  | HVRI         | Guinea-Bissau   | Bijagós        | 11.156542 | -16.019891 | W | [27] |
| PP053940  | HVRI         | Guinea-Bissau   | Bijagós        | 11.156617 | -16.019783 | W | [27] |
| PP053941  | HVRI         | Guinea-Bissau   | Bijagós        | 11.178124 | -16.017105 | W | [27] |
| PP053942  | HVRI         | Guinea-Bissau   | Bijagós        | 11.177919 | -16.017429 | W | [27] |
| PP053943  | HVRI         | Guinea-Bissau   | Bijagós        | 11.177932 | -16.017398 | W | [27] |
| PP053944  | HVRI         | Guinea-Bissau   | Bijagós        | 11.177731 | -16.017533 | W | [27] |
| PP053945  | HVRI         | Guinea-Bissau   | Bijagós        | 11.084400 | -16.221100 | W | [27] |
| PP053946  | HVRI         | Guinea-Bissau   | Bijagós        | 11.271042 | -16.174266 | W | [27] |
| PP053947  | HVRI         | Guinea-Bissau   | Boé NP         | 11.832394 | -13.805349 | W | [27] |
| PP053948  | HVRI         | Guinea-Bissau   | Boé NP         | 11.932757 | -13.785056 | W | [27] |
| PP053949  | HVRI         | Guinea-Bissau   | Boé NP         | 11.938790 | -13.781128 | W | [27] |

|          |      |               |                |           |            |   |      |
|----------|------|---------------|----------------|-----------|------------|---|------|
| PP053950 | HVRI | Guinea-Bissau | Boé NP         | 11.927518 | -14.238246 | W | [27] |
| PP053951 | HVRI | Guinea-Bissau | Boé NP         | 11.927528 | -14.238303 | W | [27] |
| PP053952 | HVRI | Guinea-Bissau | Boé NP         | 11.927584 | -14.238426 | W | [27] |
| PP053953 | HVRI | Guinea-Bissau | Boé NP         | 11.927579 | -14.238382 | W | [27] |
| PP053954 | HVRI | Guinea-Bissau | Boé NP         | 11.920890 | -14.239909 | W | [27] |
| PP053955 | HVRI | Guinea-Bissau | Boé NP         | 11.920981 | -14.239945 | W | [27] |
| PP053956 | HVRI | Guinea-Bissau | Boé NP         | 11.933605 | -13.751766 | W | [27] |
| PP053957 | HVRI | Guinea-Bissau | Boé NP         | 11.933219 | -13.751964 | W | [27] |
| PP053958 | HVRI | Guinea-Bissau | Boé NP         | 11.933229 | -13.752008 | W | [27] |
| PP053959 | HVRI | Guinea-Bissau | Boé NP         | 11.933180 | -13.752026 | W | [27] |
| PP053960 | HVRI | Guinea-Bissau | Boé NP         | 11.933180 | -13.752026 | W | [27] |
| PP053961 | HVRI | Guinea-Bissau | Boé NP         | 11.933241 | -13.751948 | W | [27] |
| PP053962 | HVRI | Guinea-Bissau | Boé NP         | 11.933191 | -13.751988 | W | [27] |
| PP053963 | HVRI | Guinea-Bissau | Boé NP         | 11.932444 | -13.756259 | W | [27] |
| PP053964 | HVRI | Guinea-Bissau | Boé NP         | 11.932556 | -13.756233 | W | [27] |
| PP053965 | HVRI | Guinea-Bissau | Boé NP         | 11.932493 | -13.756258 | W | [27] |
| PP053966 | HVRI | Guinea-Bissau | Boé NP         | 11.932562 | -13.756249 | W | [27] |
| PP053967 | HVRI | Guinea-Bissau | Boé NP         | 11.932574 | -13.756227 | W | [27] |
| PP053968 | HVRI | Guinea-Bissau | Boé NP         | 11.932548 | -13.756235 | W | [27] |
| PP053969 | HVRI | Guinea-Bissau | Boé NP         | 11.932437 | -13.756303 | W | [27] |
| PP053970 | HVRI | Guinea-Bissau | Boé NP         | 11.932504 | -13.756295 | W | [27] |
| PP053971 | HVRI | Guinea-Bissau | Boé NP         | 11.932544 | -13.756337 | W | [27] |
| PP053972 | HVRI | Guinea-Bissau | Cantanhez      | 11.111478 | -15.128143 | W | [27] |
| PP053973 | HVRI | Guinea-Bissau | Cantanhez      | 11.111486 | -15.128148 | W | [27] |
| PP053974 | HVRI | Guinea-Bissau | Cufada Lagoons | 11.645079 | -15.250188 | W | [27] |
| PP053975 | HVRI | Guinea-Bissau | Cufada Lagoons | 11.645162 | -15.250847 | W | [27] |
| PP053976 | HVRI | Guinea-Bissau | Cufada Lagoons | 11.649280 | -15.111430 | W | [27] |
| PP053977 | HVRI | Guinea-Bissau | Cufada Lagoons | 11.600576 | -15.087729 | W | [27] |
| PP053978 | HVRI | Guinea-Bissau | Cufada Lagoons | 11.600571 | -15.087734 | W | [27] |
| PP053979 | HVRI | Guinea-Bissau | Cufada Lagoons | 11.600552 | -15.087933 | W | [27] |
| PP053980 | HVRI | Guinea-Bissau | Cufada Lagoons | 11.650172 | -15.135876 | W | [27] |
| PP053981 | HVRI | Guinea-Bissau | Dulombi NP     | 11.800455 | -14.327705 | W | [27] |
| PP053982 | HVRI | Guinea-Bissau | Dulombi NP     | 11.812565 | -14.396407 | W | [27] |
| PP053983 | HVRI | Guinea-Bissau | Dulombi NP     | 11.818034 | -14.393708 | W | [27] |
| PP053984 | HVRI | Guinea-Bissau | Dulombi NP     | 11.818199 | -14.394055 | W | [27] |
| PP053985 | HVRI | Guinea-Bissau | Dulombi NP     | 11.818353 | -14.394057 | W | [27] |
| PP053986 | HVRI | Guinea-Bissau | Dulombi NP     | 11.818437 | -14.393795 | W | [27] |
| PP053987 | HVRI | Guinea-Bissau | Dulombi NP     | 11.818366 | -14.393722 | W | [27] |
| PP053988 | HVRI | Guinea-Bissau | Dulombi NP     | 11.818309 | -14.393606 | W | [27] |

---

- 23 Haus, T.; Akom, E.; Agwanda, B.; Hofreiter, M.; Roos, C.; Zinner, D. Mitochondrial Diversity and Distribution of African Green Monkeys (*Chlorocebus* Gray, 1870). *Am. J. Primatol.* **2013**, *75*, 350–360. <https://doi.org/10.1002/ajp.22113>
- 24 Williams, D.M.; Almanza, S.M.; Sifuentes-Romero, I.; Detwiler, K.M. The History, Taxonomy, and Geographic Origins of an Introduced African Monkey in the Southeastern United States. *Primates* **2021**, *62*, 617–627. <https://doi.org/10.1007/s10329-021-00890-1>.
- 26 Gaubert, P.; Njiokou, F.; Olayemi, A.; Pagani, P.; Dufour, S.; Danquah, E.; Nutsuakor, M.E.K.; Ngua, G.; Missoup, A.; Tedesco, P.A.; et al. Bushmeat Genetics: Setting up a Reference Framework for the DNA Typing of African Forest Bushmeat. *Mol. Ecol. Resour.* **2015**, *15*, 633–651. <https://doi.org/10.1111/1755-0998.12334>.
- 27 Colmonero-Costeira, I.; Djaló, M.L.; Fernandes, N.; Borges, F.; Aleixo-Pais, I.; Gerini, F.; Costa, M.; Minhós, T.; Ferreira da Silva, M.J. Improving Baseline Information on Over-Looked Generalists: Occurrence and Mitochondrial DNA Diversity of Campbell's (*Cercopithecus campbelli*) and Green Monkeys (*Chlorocebus sabaeus*) in Guinea-Bissau, West Africa. *Int. J. Primatol.* **2024**, *in press*.
- 33 Wang, Y. Molecular Polymorphisms for Phylogeny, Pedigree and Population Structure Studies. Ph.D. Thesis, University of Sydney School of Biological Sciences, Sydney, NSW, Australia, 2006.
- 43 Wertheim, J.O.; Worobey, M. A Challenge to the Ancient Origin of SIVagm Based on African Green Monkey Mitochondrial Genomes. *PLoS Pathog.* **2007**, *3*, 0866–0873. <https://doi.org/10.1371/journal.ppat.0030095>.
- 44 Guschanski, K.; Krause, J.; Sawyer, S.; Valente, L.M.; Bailey, S.; Finstermeier, K.; Sabin, R.; Gilissen, E.; Sonet, G.; Nagy, Z.T.; et al. Next-Generation Museomics Disentangles One of the Largest Primate Radiations. *Syst. Biol.* **2013**, *62*, 539–554. <https://doi.org/10.1093/sysbio/syt018>.
- 45 Dolotovskaya, S.; Torroba Bordallo, J.; Haus, T.; Noll, A.; Hofreiter, M.; Zinner, D.; Roos, C. Comparing Mitogenomic Timetrees for Two African Savannah Primate Genera (*Chlorocebus* and *Papio*). *Zool. J. Linn. Soc.* **2017**, *181*, 471–483. <https://doi.org/10.1093/zoolinnean/zlx001>.
- 46 Gossé, K.J.; Gonedelé-Bi, S.; Justy, F.; Chaber, A.L.; Kramoko, B.; Gaubert, P. DNA-Typing Surveillance of the Bushmeat in Côte d'Ivoire: A Multi-Faceted Tool for Wildlife Trade Management in West Africa. *Conserv. Genet.* **2022**, *23*, 1073–1088. <https://doi.org/10.1007/s10592-022-01474-2>.
